# Supplementary material for: Evolution and Antibacterial Evaluation of 8-Hydroxy-cycloberberine Derivatives as a Novel Family of Antibacterial Agents Against MRSA
Source: MDPI journal article supplement (doi:10.3390/molecules24050984), 2019-03-11

# Evolution and antibacterial evaluation of 8-hydroxycycloberberine derivatives as a novel family of bactericidal agents against MRSA

Yuan-Shuai Yang<sup>†</sup>, Wei Wei<sup>†</sup>, Xin-Xin Hu, Sheng Tang, Jing Pang, Xue-Fu You, Tian-Yun Fan \*\*, Yan-Xiang Wang \* and Dan-Qing Song

Figure S1. <sup>1</sup>H NMR spectrum of compound 15a

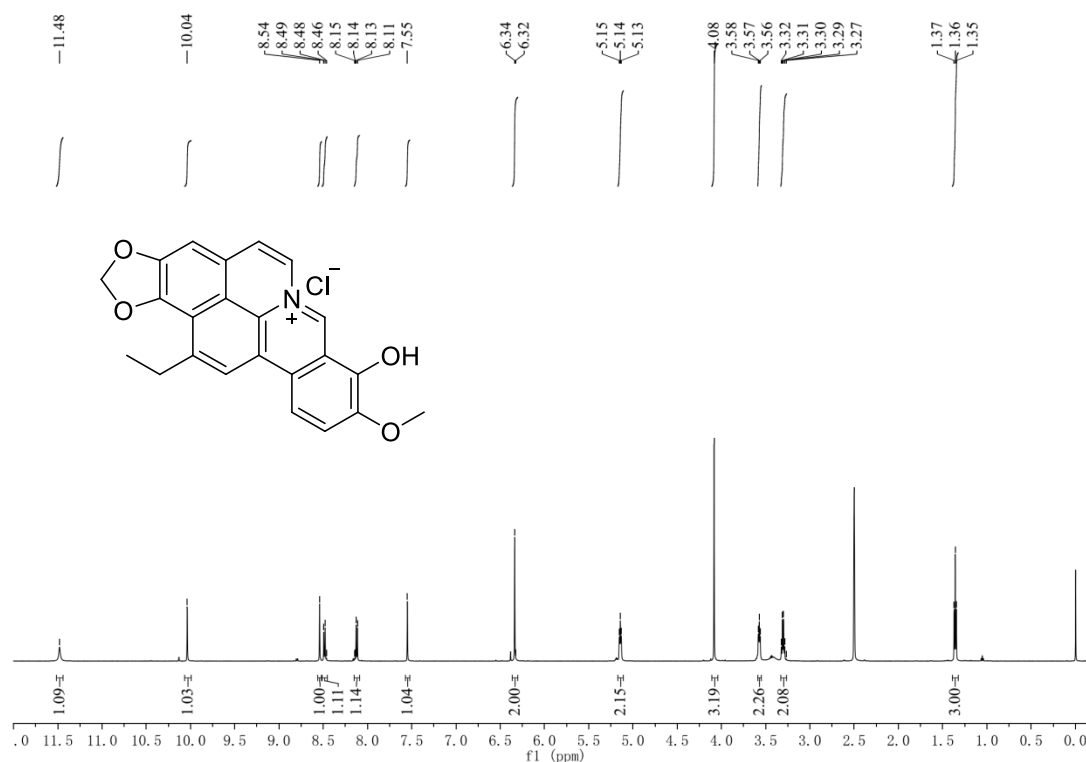

**Figure S2.  $^{13}\text{C}$ -NMR spectrum of compound 15a**

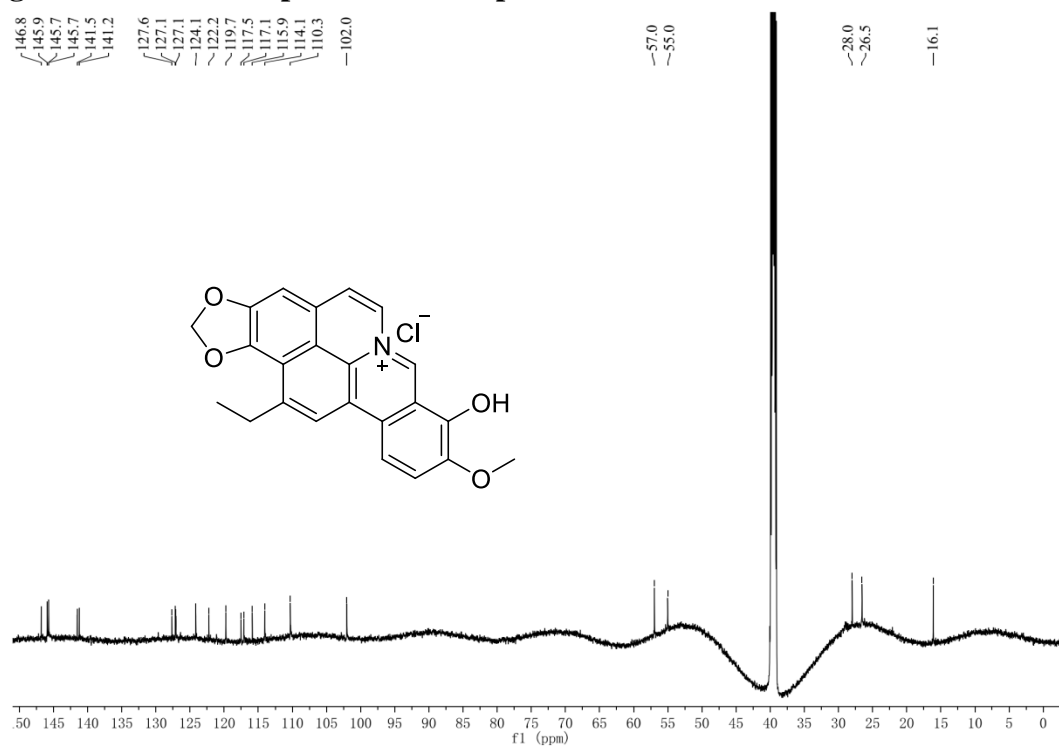

**Figure S3. HRMS spectrum of compound 15a**

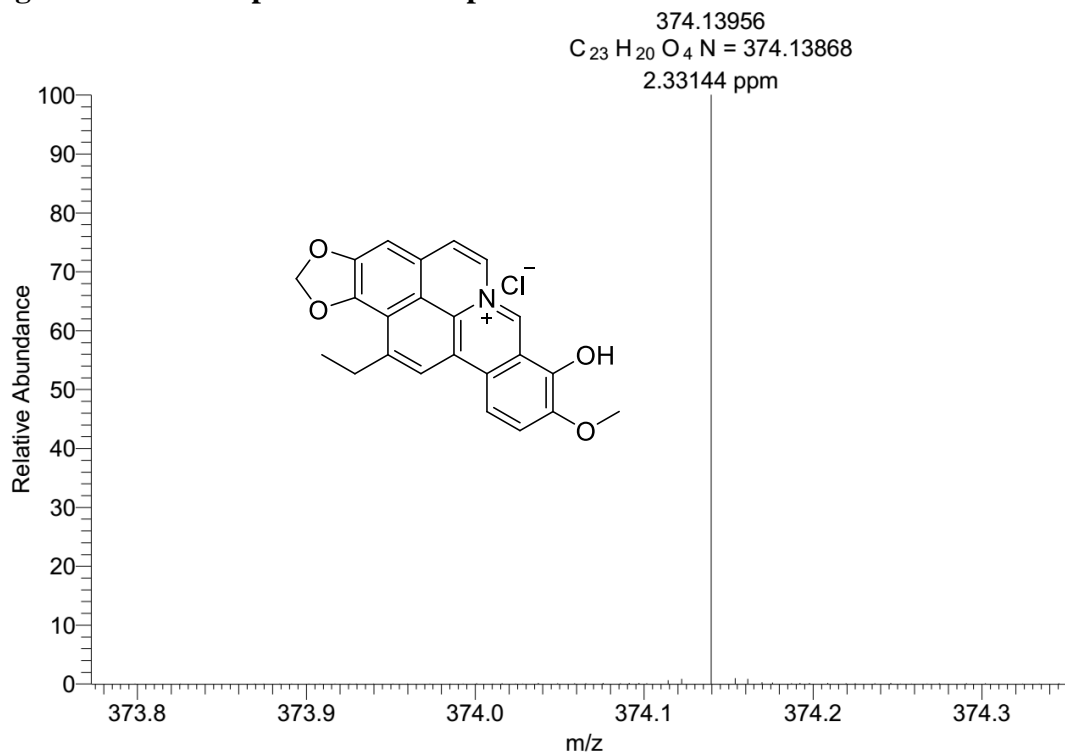

Supplement: s1 [file s1]
